# Supplementary material for: Cinnamon Oil Inhibits Penicillium expansum Growth by Disturbing the Carbohydrate Metabolic Process
Source: MDPI journal article supplement (doi:10.3390/jof7020123), 2021-02-09
Supplement: s1 [file s1]

## 1    **Supporting Information**

2    Table S1 Information of the differentially expressed proteins in *P. expansum* spores under 0.25 mg L<sup>-1</sup>  
3    cinnamon oil stress after 6 h of culturing by iTRAQ analysis.

4    Accession: the accession number of non-redundant protein database of NCBI; Expt. Mr: Experimental  
5    molecular mass; Coverage: Amino acid sequence coverage for the identified proteins; Sequence: The  
6    sequence information of identified peptides; Score: Mascot scores are statistically significant (p<0.05);  
7    Control/Cinnamon oil: Fold change of relative abundance of DEGs at control group versus cinnamon oil  
8    treatment group; COG: Clusters of Orthologous Groups of proteins; KEGG: The Kyoto Encyclopedia of  
9    Genes and Genomes; EC: Enzyme Commission; GO: Gene Ontology.

**Table S2** Primer pairs used for qRT-PCR analysis

| Name          | Number | NCBI accession             | Description                                                                    | Sequence (5'-3')                                               | Product length (bp) |
|---------------|--------|----------------------------|--------------------------------------------------------------------------------|----------------------------------------------------------------|---------------------|
| <i>PeCO1</i>  | DEP867 | gi 700451849 gb KGO41868.1 | Aldo/keto reductase                                                            | Forward: GGTTCCTCCCAAGGAATGA<br>Reverse: AACCATAGCCTGATGCACGG  | 178                 |
| <i>PeCO2</i>  | DEP861 | gi 700486419 gb KGO72046.1 | Glucose/ribitol dehydrogenase                                                  | Forward: GAGGGACTTTGCTCGTGTCA<br>Reverse: GGGTCACTTTGACGACCCAT | 126                 |
| <i>PeCO3</i>  | DEP853 | gi 700477337 gb KGO64934.1 | Polyketide synthase, enoylreductase                                            | Forward: TATCCAGGGTTCGCTCGTTG<br>Reverse: AGTCTCGACGCCATCTTTGG | 121                 |
| <i>PeCO4</i>  | DEP847 | gi 700488368 gb KGO73655.1 | Short-chain dehydrogenase/reductase SDR                                        | Forward: CGGACGGACGTTGGTAGAAA<br>Reverse: GCCGAGTTGCTGCTTTCAAT | 159                 |
| <i>PeCO5</i>  | DEP827 | gi 700475873 gb KGO63722.1 | Pyruvate carboxyltransferase                                                   | Forward: ACCACCACAAGCGCAATCTA<br>Reverse: CCTCCGTAGTTGTCGCTACC | 146                 |
| <i>PeCO6</i>  | DEP818 | gi 700477787 gb KGO65288.1 | Acetate/Propionate kinase                                                      | Forward: GACGCGTCGATCTCTGGAAT<br>Reverse: ACAGCGCTGCAAGAGGTATT | 135                 |
| <i>PeCO7</i>  | DEP811 | gi 700485292 gb KGO71124.1 | Bifunctional 6-phosphofructo-2-kinase/fructose-2, 6-bisphosphate 2-phosphatase | Forward: CGCAAAGCAATCGTTGACCA<br>Reverse: GGGTCCTGGCCTTTGTAGTC | 146                 |
| <i>PeCO8</i>  | DEP794 | gi 700460677 gb KGO49984.1 | Fructose-1,6-bisphosphatase class 1/Sedoheputulose-1,7-bisphosphatase          | Forward: GGACTCGCTGGTTCCTCAAA<br>Reverse: AGACAACAGCGTAACGAGCA | 178                 |
| <i>PeCO9</i>  | DEP789 | gi 700470445 gb KGO58790.1 | Histidine phosphatase superfamily, clade-1                                     | Forward: GAGGTTACGGAGGCGGTTAG<br>Reverse: TCTCCACCGGGACATCCATC | 134                 |
| <i>PeCO10</i> | DEP784 | gi 700469756 gb KGO58135.1 | Succinate CoA transferase                                                      | Forward: CTCTTCGACAGCGGAAACCT<br>Reverse: ATGATCTCGGGGGAGTTGGA | 149                 |

|               |        |                            |                                                                    |                                                                 |     |
|---------------|--------|----------------------------|--------------------------------------------------------------------|-----------------------------------------------------------------|-----|
| <i>PeCO11</i> | DEP781 | gi 700477299 gb KGO64915.1 | Aldehyde dehydrogenase, N-terminal                                 | Forward: CCGGGTACTTCATCCATCCG<br>Reverse: AGGACATCGTCCTCGTCAGA  | 121 |
| <i>PeCO12</i> | DEP776 | gi 700471576 gb KGO59833.1 | Pyridoxal phosphate-dependent transferase, major region, subdomain | Forward: ACCGACACTCGCTTTGTGAT<br>Reverse: ACTAGCCGCATCAACGTGAA  | 180 |
| <i>PeCO13</i> | DEP764 | gi 700478031 gb KGO65485.1 | Glucose-6-phosphate dehydrogenase, NAD-binding                     | Forward: AGCTTGTCATCCGTGTCCAG<br>Reverse: TCACGGACGAAGTTGGAGTG  | 199 |
| <i>PeCO14</i> | DEP752 | gi 700472832 gb KGO60973.1 | Glycoside hydrolase, superfamily                                   | Forward: GCCAAAGACCACGTTGTGAC<br>Reverse: GATCCAGTGGACTTGCCCTC  | 170 |
| <i>PeCO15</i> | -      | XM_016739499               | CreA, Zinc finger, C2H2                                            | Forward: AGAACATGACCCGTTTCGCAT<br>Reverse: TGGGTGAGTTGGGACGAGAG | 81  |

---

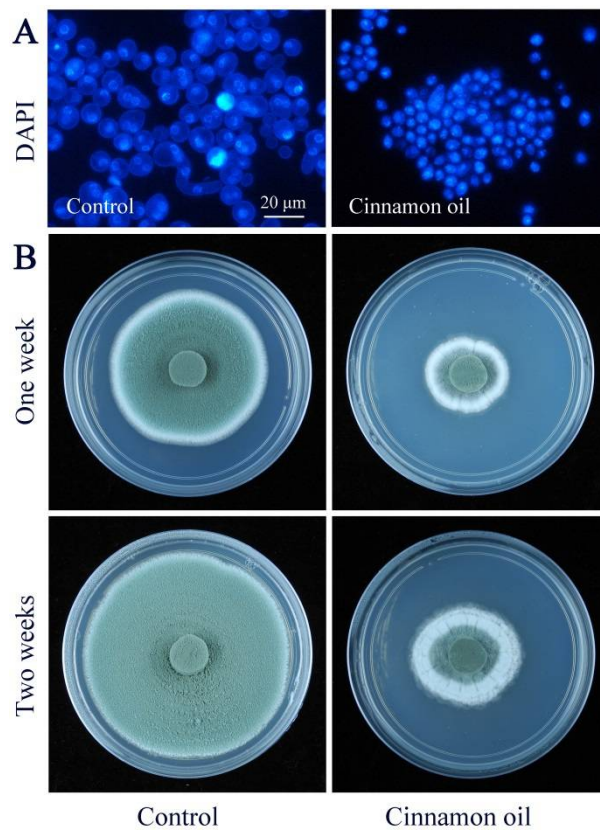

12

13 **Figure S1.** (A) Microscopic observation of *P. expansum* spores with DAPI staining after 6 h of culturing

14 under 0 or 0.25 mg L<sup>-1</sup> cinnamon oil stress. (B) Effects of 0.25 mg L<sup>-1</sup> cinnamon oil on colonial morphology

15 of *P. expansum*.

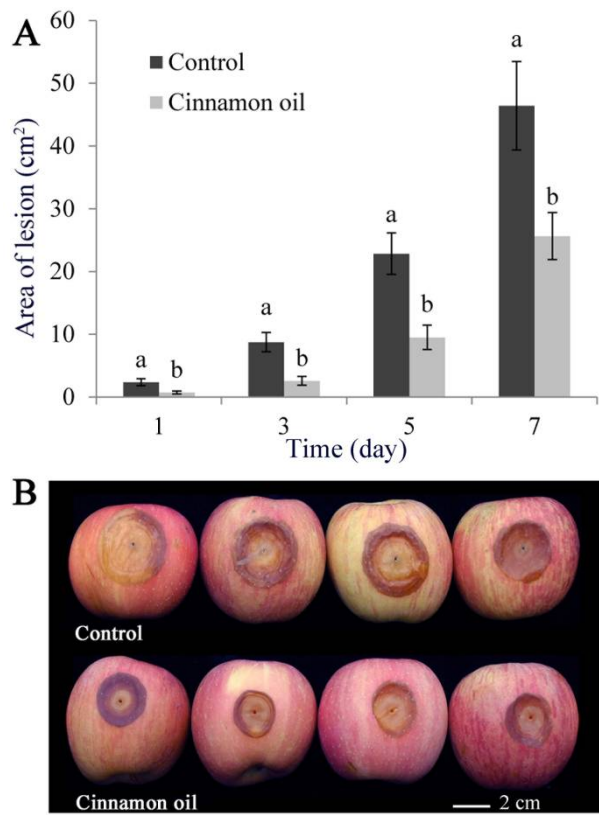

**Figure S2.** (A) Effects of 0.25 mg L<sup>-1</sup> cinnamon oil on blue mold rot caused by *P. expansum* in apple. Bar represents the standard deviation of the means of three independent experiments. Low case letters indicate significant differences at  $p < 0.05$  at each time point. (B) The apples inoculated by *P. expansum* spores with 0 or 0.25 mg L<sup>-1</sup> cinnamon oil after 7 days of storage at 25 °C.

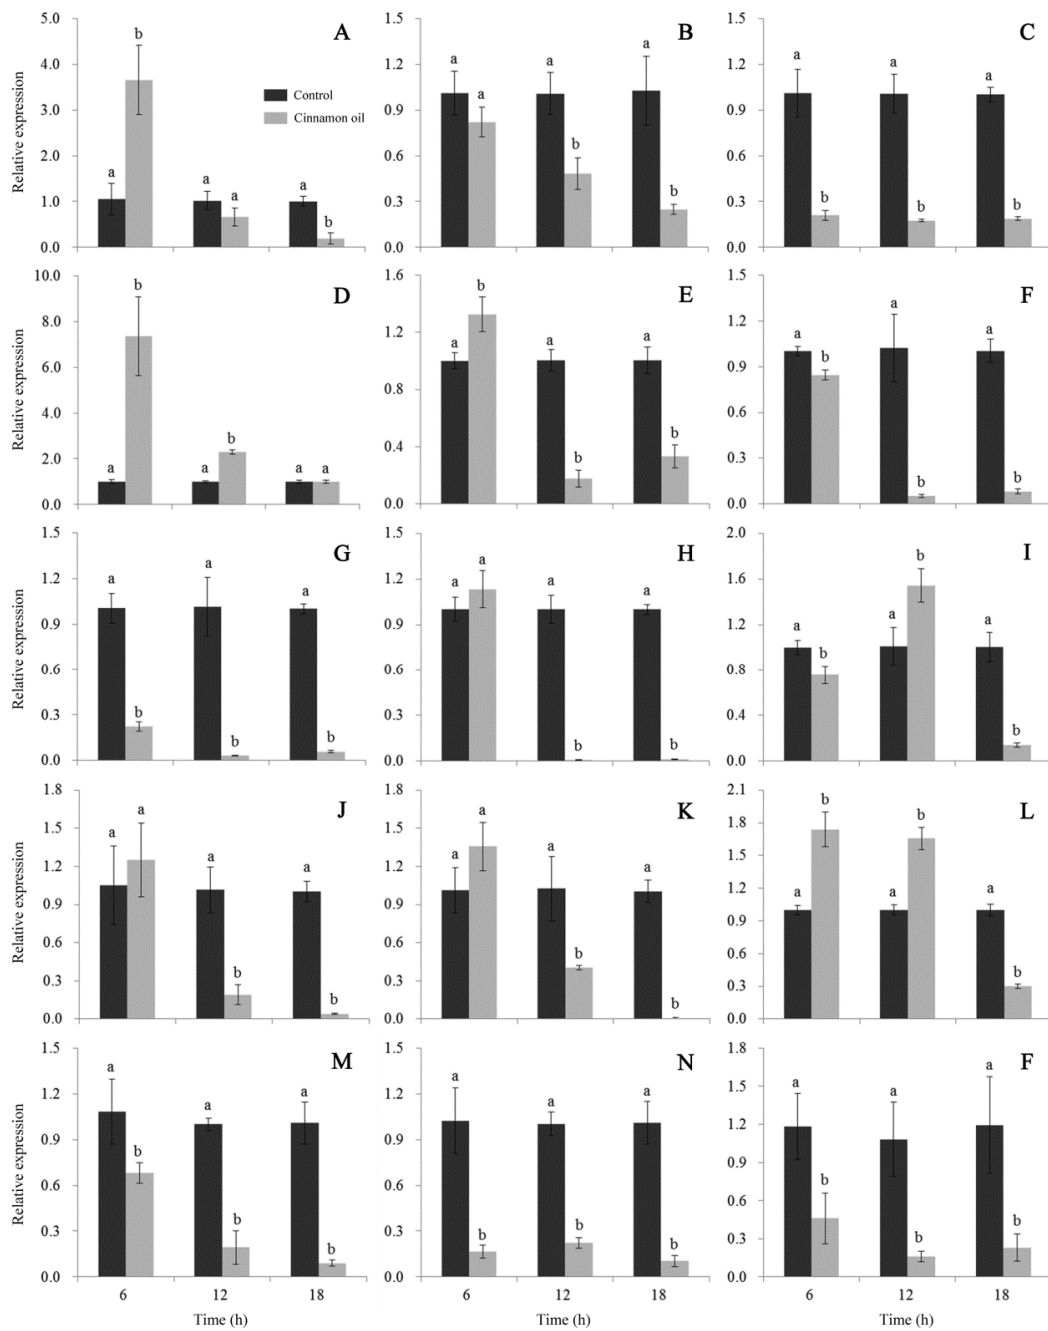

Fig. S3. Effects of 0.25 mg L<sup>-1</sup> cinnamon oil on the expression of genes involved in patulin biosynthesis in *P. expansum*. Relative expression levels of PatA to PatO (A to O) are determined by qRT-PCR and the  $\beta$ -tubulin is used as the internal control. Bar represents the standard deviation of the means of three independent experiments. Low case letters indicate significant differences at  $p < 0.05$  at each time point.

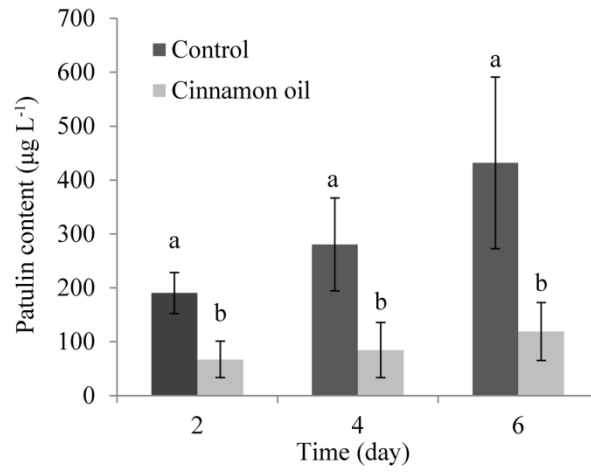

27

28 **Figure S4.** (A) Effects of 0.25 mg L<sup>-1</sup> cinnamon oil on patulin production of *P. expansum*. Bar represents  
 29 the standard deviation of the means of three independent experiments. Low case letters indicate  
 30 significant differences at  $p < 0.05$  at each time point.

31

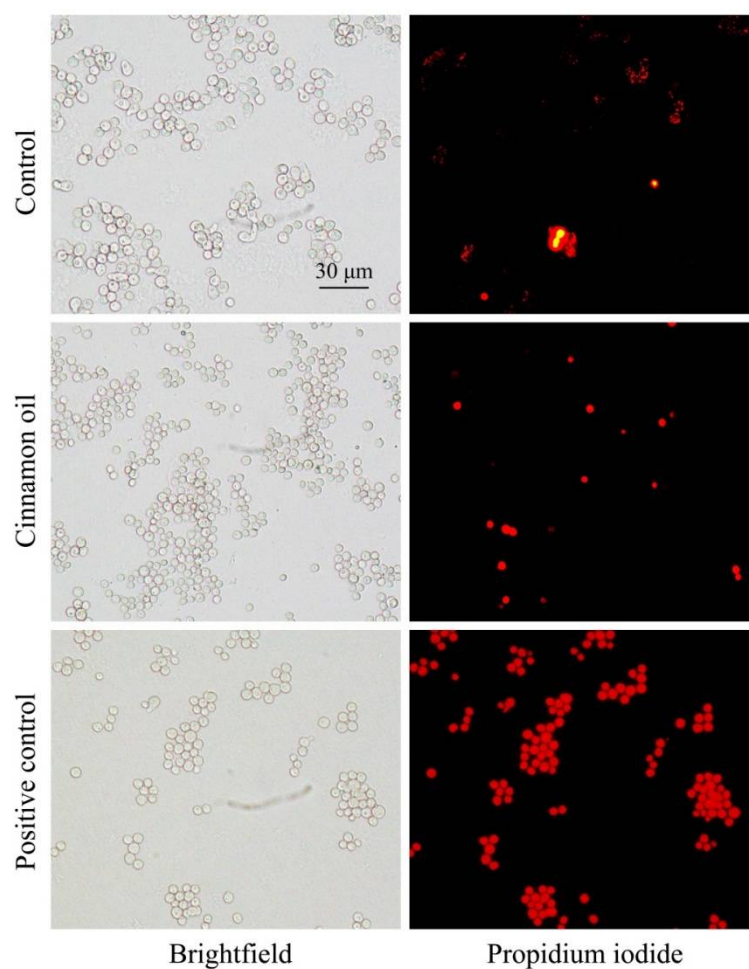

**Figure S5.** Effect of 0.25 mg L<sup>-1</sup> cinnamon oil on the membrane integrity of *P. expansum* spores. Spores were cultured at 25 °C in PDB medium supplemented with 0 (negative control), 0.25 mg L<sup>-1</sup> cinnamon oil. After 6 h of culture, half of the cinnamon oil-treated spores were incubated in boiling water for ten minutes (as positive control). Then, all the spores were stained with the prodium iodide and observed with a fluorescence microscope.
